# Supplementary material for: Clinical effect of unilateral biportal minimally invasive surgery in the treatment of patients with spinal degenerative diseases based on intelligent multimodal reconstruction technology
Source: Front Med (Lausanne). 2025 Jul 10;12:1615699. doi: 10.3389/fmed.2025.1615699 (PMC12286936; doi:10.3389/fmed.2025.1615699)
Supplement: Supplementary file 4 [file Table_4.XLSX]

## Sheet: 1 day
Control group	Observation group
42.31	37.84
39.94	48.06
45.51	40.93
39.43	40.69
50.32	44.79
44.24	38.84
38.68	40.64
37.17	50.68
31.75	38.28
40.94	48.37
45.12	38.86
39.16	45.4
48.3	39.92
47.02	34.16
47.59	42
46.91	45.8
46.06	39.14
40.98	49.1
41.64	45.09
41.04	42.37
37.42	38.63
41.75	45.9
47.63	47.58
44.99	39.25
46.17	51.99
39.9	48.03
47.62	48.37
40.82	43.76
41.14	45.37
41.74	40.59
53.05	45.73
45.36	43.92
45.11	45.37
52.04	42.35
49.63	39.18
41.99	45.4
44.77	42.65
45.41	42.94
46.75	54.44
38.86	38.58
41.26	36.74
38.72	40.15
45.05	40.28
39.09	46.47
39.68	46.29
35.65	41.6
40.98	40.4
49.54	51.84
45.09	43.79
41.42	39.21

## Sheet: 5 day
Control group	Observation group
42.63	31.95
35.54	38.46
49.77	39.19
37.73	35.83
40.23	39.59
40.27	38.05
37.76	35.62
35.4	32.3
41.65	33.38
42.5	38.47
47.55	38.75
38	36.26
38.29	35.2
37.55	33.84
39.43	38.97
42.9	34.26
39.8	40.79
36.33	34.4
42.21	37.65
37.59	31.47
34.79	34.9
42.58	39.74
35.06	36.12
36.67	32.65
35.61	31.58
38.21	33.05
41.52	26.96
40.71	38.89
39.57	34.92
38.24	43.22
37.92	37.72
38.97	36.86
44.98	31.8
43.57	31.13
40.25	35.16
45.28	34.01
39.13	33.91
40.89	34.1
40.72	36.72
40.48	42.46
47.58	38.27
45.81	32.92
38.11	39.01
30.72	38.33
43.14	44.56
38	36.09
49.33	37.38
36.55	37.84
48.03	44.38
40.54	31.15

## Sheet: 10 day
Control group	Observation group
37.52	33.31
35.1	29.42
28.24	34.96
44.27	31.73
32.32	31.82
40.83	28.71
41.95	32.96
37.81	38.82
43	31.16
38.44	25.16
31.55	31.51
34.51	34.35
36.73	32.92
33.59	27.92
36.62	36.4
40.35	35.19
37.14	38.98
37.37	32.96
34.82	31.5
37.54	30.12
38.55	35.46
37.56	37.3
34.79	26.71
37.94	34.55
36.21	40.8
37.29	35.41
35.37	32.33
38.49	28.47
33.91	33.99
33.47	32.59
37.5	30.15
35.88	29.56
36.72	30.34
36.6	33.16
32.59	33.46
35.32	33.08
36.21	28.01
33.29	33.11
40.71	33.66
28.85	30.29
30.2	36.65
34.61	34.6
44.15	28.36
39.92	33.04
36.15	33.64
27.62	31.66
32.51	30.1
35.78	36.21
36.21	35.93
36.16	29.73

## Sheet: 15 day
Control group	Observation group
29.71	28.09
33.21	32.81
33.21	27.54
40.45	29.65
33.46	28.87
37.16	30.14
31.3	33.28
36.43	26.84
29.35	32.72
35.65	30.94
36.75	34.91
33.21	29.14
30.93	27.32
41.62	26.37
34.54	24.4
30.79	28.46
35.18	30.14
32.14	27.36
36.32	34.29
37.88	28.26
32.36	36.1
33.21	30.14
35.84	29.97
32.43	33.41
33.21	33.77
33.83	21.56
33.01	30.14
29.43	30.14
27.99	30.14
34.19	32.13
27.56	27.84
33.21	30.14
33.21	28.35
35.35	29.39
28.55	30.23
30.28	30.29
36.66	22.56
33.21	32.55
33.51	26.62
33.83	34.1
32.47	30.14
31.95	30.14
31.93	34.07
35.27	30.41
23.13	26.52
38.44	28.93
29.87	32.92
35.21	32.35
31.49	34.59
30.33	35.58
